# Supplementary material for: Systemic challenges in bipolar disorder management: A patient‐centered approach
Source: PubMed Central journal article supplement — Bipolar Disord. 2017 Sep 13;19(8):676–88. doi: 10.1111/bdi.12547 (PMC5763323; doi:10.1111/bdi.12547), 2017-09-13
Supplement: BDI-19-676-s001.pdf [file BDI-19-676-s001.pdf]

## Supplementary Online Content

Nestsiarovich A, Hurwitz NG, Nelson SJ, Crisanti AS, Kerner B, Kuntz MJ, Smith AN, Volesky E, Schroeter QL, DeShaw JL, Young SS, Obenchain RL, Krall RL, Jordan K, Fawcett J, Tohen M, Perkins DJ, Lambert CG. Systemic challenges in bipolar disorder management: a patient-centered approach.

**Supplementary Table 1:** Demographic characteristics of participants of the three focus groups.

**Supplementary Table 2:** Categories of questions generated in focus groups and their mapping to 10 broad themes.

**Supplementary Table 3:** Ten questions top-rated by researcher and patient stakeholders.

**Supplementary Table 4:** Rating of questions related to the “Alternatives and adjuncts to pharmacotherapy” theme.

**Supplementary Table 5:** Rating of questions related to the “Pharmacotherapy” theme.

**Supplementary Table 6:** Rating of questions related to the “Provider relations” theme.

**Supplementary Table 7:** Rating of questions related to the “Understanding BD” theme.

**Supplementary Table 8:** Rating of questions related to the “Support” theme.

**Supplementary Table 9:** Rating of questions related to the “Health care system navigation” theme.

**Supplementary Table 10:** Rating of questions related to the “Diagnosis” theme.

**Supplementary Table 11:** Rating of questions related to the “BD coping/management” theme.

**Supplementary Table 12:** Rating of questions related to the “Social bias and stigma” theme.

**Supplementary Table 13:** Rating of questions related to the “Big ideas and children” theme.

**Supplementary Material 1:** Focus groups script

**Supplementary Table 1:** Demographic characteristics of participants of the three focus groups.

| <b>Race</b>                    | <b>Male (n=17)</b> | <b>Female (n=17)</b> | <b>Total (n=34)</b> |
|--------------------------------|--------------------|----------------------|---------------------|
| American Indian/ Alaska Native | 0                  | 1                    | 1                   |
| Asian                          | 0                  | 0                    | 0                   |
| Black/ African American        | 1                  | 2                    | 3                   |
| Hawaiian/ Pacific Islander     | 0                  | 0                    | 0                   |
| White                          | 13                 | 11                   | 24                  |
| Multi-race                     | 2                  | 0                    | 2                   |
| Unknown                        | 1                  | 3                    | 4                   |
| <b>Ethnicity</b>               | <b>Male (n=17)</b> | <b>Female (n=17)</b> | <b>Total (n=34)</b> |
| Hispanic (Latino/Latina)       | 3                  | 2                    | 5                   |
| Non-Hispanic                   | 21                 | 8                    | 29                  |
| <b>Age range</b>               | <b>Male (n=17)</b> | <b>Female (n=17)</b> | <b>Total (n=34)</b> |
| Age 20s                        | 3                  | 2                    | 5                   |
| Age 30s                        | 4                  | 2                    | 6                   |
| Age 40s                        | 2                  | 2                    | 4                   |
| Age 50s                        | 3                  | 9                    | 12                  |
| Age 60s                        | 2                  | 3                    | 5                   |
| Age 70s                        | 1                  | 1                    | 2                   |

**Supplementary Table 2:** Categories of questions generated in focus groups and their mapping to 10 broad themes.

| Original focus group categories         | Summary rank score | Broad themes                                 | Summary rank score |
|-----------------------------------------|--------------------|----------------------------------------------|--------------------|
| Alternatives and adjuncts to medication | 4                  | Alternatives and adjuncts to pharmacotherapy | 41                 |
| Drug alternatives                       | 3                  |                                              |                    |
| Other treatments                        | 20                 |                                              |                    |
| Holistic options                        | 12                 |                                              |                    |
| Lifestyle                               | 2                  |                                              |                    |
| Medications                             | 23                 | Pharmacotherapy                              | 35                 |
| Medications and adherence               | 3                  |                                              |                    |
| Pharmacology                            | 4                  |                                              |                    |
| Side effects                            | 5                  |                                              |                    |
| Sexuality                               | 0                  |                                              |                    |
| Doctor communication/collaboration      | 16                 | Provider relations                           | 24                 |
| Provider relations                      | 8                  |                                              |                    |
| Understanding bipolar                   | 2                  | Understanding BD                             | 23                 |
| Causes of bipolar                       | 3                  |                                              |                    |
| Education                               | 12                 |                                              |                    |
| Symptoms                                | 0                  |                                              |                    |
| Behaviors                               | 6                  |                                              |                    |
| Support/Advocacy                        | 9                  | Support                                      | 21                 |
| Social and family support               | 3                  |                                              |                    |
| Support resources                       | 1                  |                                              |                    |
| Family dynamics                         | 8                  |                                              |                    |
| Healthcare system navigation            | 3                  | Health care system navigation                | 14                 |
| Treatment assessment/cost               | 11                 |                                              |                    |
| Criminal justice system                 | 0                  |                                              |                    |
| Diagnosis and research                  | 10                 | Diagnosis                                    | 13                 |
| Diagnosis/screening                     | 3                  |                                              |                    |

|                               |   |                                                                                                           |          |
|-------------------------------|---|-----------------------------------------------------------------------------------------------------------|----------|
| <b>Symptom management</b>     | 4 | <b>BD coping/management</b>                                                                               | <b>8</b> |
| <b>Crisis management</b>      | 4 |                                                                                                           |          |
| <b>Coping</b>                 | 0 |                                                                                                           |          |
| <b>Social bias and stigma</b> | 6 | <b>Social bias and stigma</b>                                                                             | <b>8</b> |
| <b>Stigma</b>                 | 2 |                                                                                                           |          |
| <b>Big Ideas</b>              | 8 | <b>Other</b><br><b>(these groups contained miscellaneous</b><br><b>questions covered by themes above)</b> | <b>8</b> |
| <b>Children</b>               | 6 |                                                                                                           | <b>6</b> |

**Supplementary Table 3:** Ten questions top-rated by researcher and patient stakeholders.

| # | 10 top-ranked questions by both researcher and patient stakeholders                                                                                                                                                  |               | 10 top-ranked questions by researcher stakeholders                                                                                                                                                                   |               | 10 top-ranked questions by patients stakeholders                                                                                                                                                                                                                                                                                                                                                                                                                                                                                                                   |               |
|---|----------------------------------------------------------------------------------------------------------------------------------------------------------------------------------------------------------------------|---------------|----------------------------------------------------------------------------------------------------------------------------------------------------------------------------------------------------------------------|---------------|--------------------------------------------------------------------------------------------------------------------------------------------------------------------------------------------------------------------------------------------------------------------------------------------------------------------------------------------------------------------------------------------------------------------------------------------------------------------------------------------------------------------------------------------------------------------|---------------|
|   | Questions                                                                                                                                                                                                            | Average score | Questions                                                                                                                                                                                                            | Average score | Questions                                                                                                                                                                                                                                                                                                                                                                                                                                                                                                                                                          | Average score |
| 1 | What can be done to eliminate suicidal thoughts with some medications?                                                                                                                                               | 4.750         | What can be done to eliminate suicidal thoughts with some medications?                                                                                                                                               | 4.750         | Medications don't always work the same for everyone. Medications: how do you get the right cocktail? What can be done to stop, "take this and see if it works" policy? How do I know this treatment option will work? How do I know what medication will work for me?                                                                                                                                                                                                                                                                                              | 5.000         |
| 2 | For the BD brain to not be medicated, what are the consequences? I wish I had information about why I need medication. What are the risks of takings medications or not? Why do I have to take this? Explain please? | 4.688         | For the BD brain to not be medicated, what are the consequences? I wish I had information about why I need medication. What are the risks of takings medications or not? Why do I have to take this? Explain please? | 4.625         | Drug side effects. What are all the side effects of my medication? What are the side effects of medicines? What is a side effects of this medication? What's the safest medications to take first? How to make sure your love one is taking his medications; what will be the side effects? What kind of side effects do I need to be aware of? How do I deal with the side effects of my medication when I'm re-entering the work force, social environments, etc.? More details on medication metabolization, effect duration, risks of overdose, ramp up times. | 5.000         |

|   |                                                                                                                                                                                                                                                                                                                                                                                                                                                                                                                                                                    |       |                                                                        |       |                                                                                                                                                                                                                      |       |
|---|--------------------------------------------------------------------------------------------------------------------------------------------------------------------------------------------------------------------------------------------------------------------------------------------------------------------------------------------------------------------------------------------------------------------------------------------------------------------------------------------------------------------------------------------------------------------|-------|------------------------------------------------------------------------|-------|----------------------------------------------------------------------------------------------------------------------------------------------------------------------------------------------------------------------|-------|
| 3 | Medications don't always work the same for everyone. Medications: how do you get the right cocktail? What can be done to stop, "take this and see if it works" policy? How do I know this treatment option will work? How do I know what medication will work for me?                                                                                                                                                                                                                                                                                              | 4.688 | What is the efficacy of my treatment?                                  | 4.500 | When is too much medication. Why do they prescribe so many medications?                                                                                                                                              | 4.875 |
| 4 | Drug side effects. What are all the side effects of my medication? What are the side effects of medicines? What is a side effects of this medication? What's the safest medications to take first? How to make sure your love one is taking his medications; what will be the side effects? What kind of side effects do I need to be aware of? How do I deal with the side effects of my medication when I'm re-entering the work force, social environments, etc.? More details on medication metabolization, effect duration, risks of overdose, ramp up times. | 4.688 | Would have been good to know severity of symptoms, especially dangers. | 4.500 | For the BD brain to not be medicated, what are the consequences? I wish I had information about why I need medication. What are the risks of takings medications or not? Why do I have to take this? Explain please? | 4.750 |
| 5 | When is too much medication. Why do they prescribe so many medications?                                                                                                                                                                                                                                                                                                                                                                                                                                                                                            | 4.563 | How will the drugs interact with each other?                           | 4.375 | How should I manage the manic episode?                                                                                                                                                                               | 4.750 |

|   |                                                                        |       |                                                                                                                                                                                                                                                                                                                                                                                                                                                                                                                                                               |       |                                                                                                                                    |       |
|---|------------------------------------------------------------------------|-------|---------------------------------------------------------------------------------------------------------------------------------------------------------------------------------------------------------------------------------------------------------------------------------------------------------------------------------------------------------------------------------------------------------------------------------------------------------------------------------------------------------------------------------------------------------------|-------|------------------------------------------------------------------------------------------------------------------------------------|-------|
| 6 | What is the efficacy of my treatment?                                  | 4.563 | Medications don't always work the same for everyone. Medications: how do you get the right cocktail? What can be done to stop, "take this and see if it works" policy? How do I know this treatment option will work? How do I know what medication will work for me?                                                                                                                                                                                                                                                                                         | 4.375 | I take lithium, "Geodon", "Buspar", hydroxyzine, and "Lyrica". My question is which antipsychotic works best for bipolar disorder? | 4.750 |
| 7 | Would have been good to know severity of symptoms, especially dangers. | 4.563 | Drug cravings vs. different medications? Real discussion about medications interactions with substances. What are these?                                                                                                                                                                                                                                                                                                                                                                                                                                      | 4.375 | What are therapeutic treatment windows? How do these affect how I take medications? More information about medication and dosages. | 4.750 |
| 8 | How should I manage the manic episode?                                 | 4.500 | Drug side effects. What are all the side effects of my medication? What are the side effects of medicines? What is a side effects of this medication? What's the safest medication to take first? How to make sure your love one is taking his medications; what will be the side effects? What kind of side effects do I need to be aware of? How do I deal with the side effects of my medication when I'm re-entering the work force, social environments, etc.? More details on medication metabolism, effect duration, risks of overdose, ramp up times. | 4.375 | What can be done to eliminate suicidal thoughts with some medications?                                                             | 4.750 |

|    |                                                                                                                                    |       |                                                                                                                                                                                                                                                                                                                                                                                                                                                                                                                                                                |       |                                                                                                                                                                                                                                                                                                                                                                                                                                                                                                                                                                |       |
|----|------------------------------------------------------------------------------------------------------------------------------------|-------|----------------------------------------------------------------------------------------------------------------------------------------------------------------------------------------------------------------------------------------------------------------------------------------------------------------------------------------------------------------------------------------------------------------------------------------------------------------------------------------------------------------------------------------------------------------|-------|----------------------------------------------------------------------------------------------------------------------------------------------------------------------------------------------------------------------------------------------------------------------------------------------------------------------------------------------------------------------------------------------------------------------------------------------------------------------------------------------------------------------------------------------------------------|-------|
| 9  | I take lithium, "Geodon", "Buspar", hydroxyzine, and "Lyrica". My question is which antipsychotic works best for bipolar disorder? | 4.500 | [Are] side effects different for young children? I want to know how puberty affects medication efficacy.                                                                                                                                                                                                                                                                                                                                                                                                                                                       | 4.375 | What happens when people do not want to be medicated? How can you help them? (I have read [book]: I am not sick, I don't need help). Have people been healed without drugs? What options do I have outside of drug treatment? Are there studies of people who do alternative therapies to medication who succeed? What are all of my treatment options? What are available treatments? What are treatment choices? What kinds of therapy should I try? What type of therapy is good for mental illness? When should I take medicine vs therapy for my bipolar? | 4.625 |
| 10 | How will the drugs interact with each other?                                                                                       | 4.500 | What happens when people do not want to be medicated? How can you help them? (I have read [book]: I am not sick, I don't need help). Have people been healed without drugs? What options do I have outside of drug treatment? Are there studies of people who do alternative therapies to medication who succeed? What are all of my treatment options? What are available treatments? What are treatment choices? What kinds of therapy should I try? What type of therapy is good for mental illness? When should I take medicine vs therapy for my bipolar? | 4.250 | How will the drugs interact with each other?                                                                                                                                                                                                                                                                                                                                                                                                                                                                                                                   | 4.625 |

**Supplementary Table 4:** Rating of questions related to the “Alternatives and adjuncts to pharmacotherapy” theme.

| Researcher and patient stakeholders                                                                                                                                                                                                                                                                                                                                                                                                                                                                                                                            |               | Researcher stakeholders                                                                                                                                                                                                                                                                                                                                                                                                                                                                                                                                        |               | Patient stakeholders                                                                                                                                                                                                                                                                                                                                                                                                                                                                                                                                           |               |
|----------------------------------------------------------------------------------------------------------------------------------------------------------------------------------------------------------------------------------------------------------------------------------------------------------------------------------------------------------------------------------------------------------------------------------------------------------------------------------------------------------------------------------------------------------------|---------------|----------------------------------------------------------------------------------------------------------------------------------------------------------------------------------------------------------------------------------------------------------------------------------------------------------------------------------------------------------------------------------------------------------------------------------------------------------------------------------------------------------------------------------------------------------------|---------------|----------------------------------------------------------------------------------------------------------------------------------------------------------------------------------------------------------------------------------------------------------------------------------------------------------------------------------------------------------------------------------------------------------------------------------------------------------------------------------------------------------------------------------------------------------------|---------------|
| Question                                                                                                                                                                                                                                                                                                                                                                                                                                                                                                                                                       | Average score | Question                                                                                                                                                                                                                                                                                                                                                                                                                                                                                                                                                       | Average score | Question                                                                                                                                                                                                                                                                                                                                                                                                                                                                                                                                                       | Average score |
| For the BD brain to not be medicated, what are the consequences? I wish I had info about why I need medication. What are the risks of takings medications or not? Why do I have to take this? Explain please?                                                                                                                                                                                                                                                                                                                                                  | 4.688         | For the BD brain to not be medicated, what are the consequences? I wish I had info about why I need medication. What are the risks of takings medications or not? Why do I have to take this? Explain please?                                                                                                                                                                                                                                                                                                                                                  | 4.625         | For the BD brain to not be medicated, what are the consequences? I wish I had info about why I need medication. What are the risks of taking medications or not? Why do I have to take this? Explain please?                                                                                                                                                                                                                                                                                                                                                   | 4.750         |
| What happens when people do not want to be medicated? How can you help them? (I have read [book]: I am not sick, I don't need help). Have people been healed without drugs? What options do I have outside of drug treatment? Are there studies of people who do alternative therapies to medication who succeed? What are all of my treatment options? What are available treatments? What are treatment choices? What kinds of therapy should I try? What type of therapy is good for mental illness? When should I take medicine vs therapy for my bipolar? | 4.438         | What happens when people do not want to be medicated? How can you help them? (I have read [book]: I am not sick, I don't need help). Have people been healed without drugs? What options do I have outside of drug treatment? Are there studies of people who do alternative therapies to medication who succeed? What are all of my treatment options? What are available treatments? What are treatment choices? What kinds of therapy should I try? What type of therapy is good for mental illness? When should I take medicine vs therapy for my bipolar? | 4.250         | What happens when people do not want to be medicated? How can you help them? (I have read [book]: I am not sick, I don't need help). Have people been healed without drugs? What options do I have outside of drug treatment? Are there studies of people who do alternative therapies to medication who succeed? What are all of my treatment options? What are available treatments? What are treatment choices? What kinds of therapy should I try? What type of therapy is good for mental illness? When should I take medicine vs therapy for my bipolar? | 4.625         |
| Alcohol helps symptoms in short term. What are long term damages? What effect will alcohol have on my treatment?                                                                                                                                                                                                                                                                                                                                                                                                                                               | 4.063         | Alcohol helps symptoms in short term. What are long term damages? What effect will alcohol have on my treatment?                                                                                                                                                                                                                                                                                                                                                                                                                                               | 4.125         | One treatment, center for education, diet, medication, job placements, training.                                                                                                                                                                                                                                                                                                                                                                                                                                                                               | 4.375         |

|                                                                                                                                                              |       |                                                                                                                                                                                                                                             |       |                                                                                                                                                              |       |
|--------------------------------------------------------------------------------------------------------------------------------------------------------------|-------|---------------------------------------------------------------------------------------------------------------------------------------------------------------------------------------------------------------------------------------------|-------|--------------------------------------------------------------------------------------------------------------------------------------------------------------|-------|
| How does the substance abuse reinforce the disease? What do I need to know about interactions with pot, alcohol, LSD, etc.? What do others abuses look like? | 3.875 | How does the substance abuse reinforce the disease? What do I need to know about interactions with pot, alcohol, LSD, etc.? What do others abuses look like?                                                                                | 4.000 | How can one incorporate diet, exercise, mindfulness, etc.? Why aren't these part of treatment plan?                                                          | 4.250 |
| Do I have any options to try first before psychotropic medications?                                                                                          | 3.813 | Do I have any options to try first before psychotropic medications?                                                                                                                                                                         | 3.875 | Effect of stressors +sleep hygiene                                                                                                                           | 4.125 |
| Effect of stressors +sleep hygiene                                                                                                                           | 3.750 | Effect of stressors +sleep hygiene                                                                                                                                                                                                          | 3.375 | Classes, structure, life skills                                                                                                                              | 4.000 |
| How can one incorporate diet, exercise, mindfulness, etc.? Why aren't these part of treatment plan?                                                          | 3.688 | How can one incorporate diet, exercise, mindfulness, etc.? Why aren't these part of treatment plan?                                                                                                                                         | 3.125 | Alcohol helps symptoms in short term. What are long term damages? What effect will alcohol have on my treatment?                                             | 4.000 |
| One treatment, center for education, diet, medication, job placements, training.                                                                             | 3.625 | How nutrition could affect condition? Caffeine, vitamins, alcohol, etc.                                                                                                                                                                     | 3.125 | How nutrition could affect condition? Caffeine, vitamins, alcohol, etc.                                                                                      | 3.875 |
| Classes, structure, life skills.                                                                                                                             | 3.500 | Are there research studies on the horizon incorporating CBD [Cannabidiol] therapy for BD? THC [Tetrahydrocannabinol]? Oil/Smoke - - Knock off mania -- relax depression. What are side effects of smoking marijuana for [a] bipolar person? | 3.125 | Do I have any options to try first before psychotropic medications?                                                                                          | 3.750 |
| How nutrition could affect condition? Caffeine, vitamins, alcohol, etc.                                                                                      | 3.500 | Classes, structure, life skills.                                                                                                                                                                                                            | 3.000 | How does the substance abuse reinforce the disease? What do I need to know about interactions with pot, alcohol, LSD, etc.? What do others abuses look like? | 3.750 |
| How can lifestyle changes help? Is dairy a known trigger? What research is being done on special diet therapy for BD ketogenic? Diet.                        | 3.250 | How can lifestyle changes help? Is dairy a known trigger? What research is being done on special diet therapy for BD ketogenic? Diet.                                                                                                       | 3.000 | How can lifestyle changes help? Is dairy a known trigger? What research is being done on special diet therapy for BD ketogenic? Diet.                        | 3.500 |

|                                                                                                                                                                                                                                            |       |                                                                                  |       |                                                                                                                                                                                                                                            |       |
|--------------------------------------------------------------------------------------------------------------------------------------------------------------------------------------------------------------------------------------------|-------|----------------------------------------------------------------------------------|-------|--------------------------------------------------------------------------------------------------------------------------------------------------------------------------------------------------------------------------------------------|-------|
| Are there research studies on the horizon incorporating CBD [Cannabidiol] therapy for BD? THC [Tetrahydrocannabinol]? Oil/Smoke -- Knock off mania -- relax depression. What are side effects of smoking marijuana for [a] bipolar person? | 3.188 | One treatment, center for education, diet, medication, job placements, training. | 2.875 | Are there research studies on the horizon incorporating CBD [Cannabidiol] therapy for BD? THC [Tetrahydrocannabinol]? Oil/Smoke -- Knock off mania -- relax depression. What are side effects of smoking marijuana for [a] bipolar person? | 3.250 |
| Bipolar and LSD?                                                                                                                                                                                                                           | 2.688 | Bipolar and LSD?                                                                 | 2.375 | Bipolar and LSD?                                                                                                                                                                                                                           | 3.000 |

**Supplementary Table 5:** Rating of questions related to the “Pharmacotherapy” theme.

| Researcher and patient stakeholders                                                                                                                                                                                                                                   |               | Researcher stakeholders                                                |               | Patient stakeholders                                                                                                                                                                                                                                                                                                                                                                                                                                                                                                                                        |               |
|-----------------------------------------------------------------------------------------------------------------------------------------------------------------------------------------------------------------------------------------------------------------------|---------------|------------------------------------------------------------------------|---------------|-------------------------------------------------------------------------------------------------------------------------------------------------------------------------------------------------------------------------------------------------------------------------------------------------------------------------------------------------------------------------------------------------------------------------------------------------------------------------------------------------------------------------------------------------------------|---------------|
| Question                                                                                                                                                                                                                                                              | Average score | Question                                                               | Average score | Question                                                                                                                                                                                                                                                                                                                                                                                                                                                                                                                                                    | Average score |
| What can be done to eliminate suicidal thoughts with some medications?                                                                                                                                                                                                | 4.750         | What can be done to eliminate suicidal thoughts with some medications? | 4.750         | Medications don't always work the same for everyone. Medications: how do you get the right cocktail? What can be done to stop, "take this and see if it works" policy? How do I know this treatment option will work? How do I know what medication will work for me?                                                                                                                                                                                                                                                                                       | 5.000         |
| Medications don't always work the same for everyone. Medications: how do you get the right cocktail? What can be done to stop, "take this and see if it works" policy? How do I know this treatment option will work? How do I know what medication will work for me? | 4.688         | What is the efficacy of my treatment?                                  | 4.500         | Drug side effects. What are ALL the side effects of my medication? What are the side effects of medicines? What is a side effects of this medication? What's the safest medications to take first? How to make sure your love one is taking his meds; what will be the side effects? What kind of side effects do I need to be aware of? How do I deal with the side effects of my medication when I'm re-entering the work force, social environments, etc.? More details on medication metabolization, effect duration, risks of overdose, ramp up times. | 5.000         |

|                                                                                                                                                                                                                                                                                                                                                                                                                                                                                                                                                                       |       |                                                                                                                                                                                                                                                                       |       |                                                                                                                                    |       |
|-----------------------------------------------------------------------------------------------------------------------------------------------------------------------------------------------------------------------------------------------------------------------------------------------------------------------------------------------------------------------------------------------------------------------------------------------------------------------------------------------------------------------------------------------------------------------|-------|-----------------------------------------------------------------------------------------------------------------------------------------------------------------------------------------------------------------------------------------------------------------------|-------|------------------------------------------------------------------------------------------------------------------------------------|-------|
| <p>Drug side effects. What are ALL the side effects of my medication? What are the side effects of medicines? What are the side effects of this medication? What's the safest medications to take first? How to make sure your love one is taking his meds; what will be the side effects? What kind of side effects do I need to be aware of? How do I deal with the side effects of my medication when I'm re-entering the work force, social environments, etc.? More details on medication metabolization, effect duration, risks of overdose, ramp up times.</p> | 4.688 | How will the drugs interact with each other?                                                                                                                                                                                                                          | 4.375 | When is too much medication. Why do they prescribe so many medications?                                                            | 4.875 |
| <p>When is too much medication. Why do they prescribe so many medications?</p>                                                                                                                                                                                                                                                                                                                                                                                                                                                                                        | 4.563 | Medications don't always work the same for everyone. Medications: how do you get the right cocktail? What can be done to stop, "take this and see if it works" policy? How do I know this treatment option will work? How do I know what medication will work for me? | 4.375 | I take lithium, "Geodon", "Buspar", hydroxyzine, and "Lyrica". My question is which antipsychotic works best for bipolar disorder? | 4.750 |
| <p>What is the efficacy of my treatment?</p>                                                                                                                                                                                                                                                                                                                                                                                                                                                                                                                          | 4.563 | Drug cravings vs. different meds? Real discussion about medications interactions with substances. What are these?                                                                                                                                                     | 4.375 | What are therapeutic treatment windows? How do these affect how I take meds? More information about medication and dosages.        | 4.750 |

|                                                                                                                                    |       |                                                                                                                                                                                                                                                                                                                                                                                                                                                                                                                                                             |       |                                                                        |       |
|------------------------------------------------------------------------------------------------------------------------------------|-------|-------------------------------------------------------------------------------------------------------------------------------------------------------------------------------------------------------------------------------------------------------------------------------------------------------------------------------------------------------------------------------------------------------------------------------------------------------------------------------------------------------------------------------------------------------------|-------|------------------------------------------------------------------------|-------|
| I take lithium, "Geodon", "Buspar", hydroxyzine, and "Lyrica". My question is which antipsychotic works best for bipolar disorder? | 4.500 | Drug side effects. What are ALL the side effects of my medication? What are the side effects of medicines? What is a side effects of this medication? What's the safest medications to take first? How to make sure your love one is taking his meds; what will be the side effects? What kind of side effects do I need to be aware of? How do I deal with the side effects of my medication when I'm re-entering the work force, social environments, etc.? More details on medication metabolization, effect duration, risks of overdose, ramp up times. | 4.375 | What can be done to eliminate suicidal thoughts with some medications? | 4.750 |
| How will the drugs interact with each other?                                                                                       | 4.500 | I take lithium, "Geodon", "Buspar", hydroxyzine, and "Lyrica". My question is which antipsychotic works best for bipolar disorder?                                                                                                                                                                                                                                                                                                                                                                                                                          | 4.250 | How will the drugs interact with each other?                           | 4.625 |
| "Invega" shot.                                                                                                                     | 4.375 | "Invega" shot.                                                                                                                                                                                                                                                                                                                                                                                                                                                                                                                                              | 4.250 | What is the efficacy of my treatment?                                  | 4.625 |
| What are therapeutic treatment windows? How do these affect how I take meds? More information about medication and dosages.        | 4.313 | When is too much medication. Why do they prescribe so many medications?                                                                                                                                                                                                                                                                                                                                                                                                                                                                                     | 4.250 | "Invega" shot.                                                         | 4.500 |
| Drugs --> Birth defects, obesity, elevated appetite, diabetes                                                                      | 4.313 | When on multiple drugs how to be sure they're safe together?                                                                                                                                                                                                                                                                                                                                                                                                                                                                                                | 4.125 | One drug at a time -- so I know side effects of each one               | 4.500 |

|                                                                                                                                                                                                                                                                                                                                 |       |                                                                                                           |       |                                                                                                                                                                                                                                                                                                                                 |       |
|---------------------------------------------------------------------------------------------------------------------------------------------------------------------------------------------------------------------------------------------------------------------------------------------------------------------------------|-------|-----------------------------------------------------------------------------------------------------------|-------|---------------------------------------------------------------------------------------------------------------------------------------------------------------------------------------------------------------------------------------------------------------------------------------------------------------------------------|-------|
| How can one best understand side effects, benefits of a drug & how to mitigate undesired side effects, like weight gain? I am experiencing weight gain from this medication and what alternatives may I have? I would like to have known more about side effects. Getting fat!!Why do some medications make a person so hungry? | 4.250 | What's the effect on a bipolar patient's recovery when having taking an antidepressants versus not?       | 4.125 | How can one best understand side effects, benefits of a drug & how to mitigate undesired side effects, like weight gain? I am experiencing weight gain from this medication and what alternatives may I have? I would like to have known more about side effects. Getting fat!!Why do some medications make a person so hungry? | 4.500 |
| Drug cravings vs. different meds? Real discussion about medications interactions with substances. What are these?                                                                                                                                                                                                               | 4.250 | Drugs --> Birth defects, obesity, elevated appetite, diabetes                                             | 4.125 | Drugs --> Birth defects, obesity, elevated appetite, diabetes                                                                                                                                                                                                                                                                   | 4.500 |
| Medication makes me physically ill. Would be nice to have medications that don't                                                                                                                                                                                                                                                | 4.188 | Medication makes me physically ill. Would be nice to have medications that don't                          | 4.000 | Medication makes me physically ill. Would be nice to have medications that don't                                                                                                                                                                                                                                                | 4.375 |
| When on multiple drugs how to be sure they're safe together?                                                                                                                                                                                                                                                                    | 4.188 | What is the best way to get a streamline on all medications that could work for several different issues? | 4.000 | Is it advisable to go off antipsychotics if a person has a predisposition to diabetes? If so, what would be alternative?                                                                                                                                                                                                        | 4.375 |
| Is it dangerous to change meds?                                                                                                                                                                                                                                                                                                 | 4.188 | Is it dangerous to change meds?                                                                           | 4.000 | How can I know if it's my medications making me sick or my disease?                                                                                                                                                                                                                                                             | 4.375 |
| Better explanation of side effect times vs medicinal effect                                                                                                                                                                                                                                                                     | 4.188 | Better explanation of side effect times vs medicinal effect                                               | 4.000 | What is the best way to wean off meds?                                                                                                                                                                                                                                                                                          | 4.375 |
| One drug at a time -- so I know side effects of each one                                                                                                                                                                                                                                                                        | 4.188 | What will help me sleep without making me psychotic?                                                      | 4.000 | Is it dangerous to change meds?                                                                                                                                                                                                                                                                                                 | 4.375 |

|                                                                                                                             |       |                                                                                                                                                                                                                                                                                                                                 |       |                                                                                                                             |       |
|-----------------------------------------------------------------------------------------------------------------------------|-------|---------------------------------------------------------------------------------------------------------------------------------------------------------------------------------------------------------------------------------------------------------------------------------------------------------------------------------|-------|-----------------------------------------------------------------------------------------------------------------------------|-------|
| What will help me sleep without making me psychotic?                                                                        | 4.188 | How can one best understand side effects, benefits of a drug & how to mitigate undesired side effects, like weight gain? I am experiencing weight gain from this medication and what alternatives may I have? I would like to have known more about side effects. Getting fat!!Why do some medications make a person so hungry? | 4.000 | Better explanation of side effect times vs medicinal effect                                                                 | 4.375 |
| How can I know if it's my medications making me sick or my disease?                                                         | 4.125 | Are there shots or implants for effective BD treatment?                                                                                                                                                                                                                                                                         | 4.000 | What will help me sleep without making me psychotic?                                                                        | 4.375 |
| How many times a night did patients waken on different meds?                                                                | 4.063 | What are therapeutic treatment windows? How do these affect how I take meds? More information about medication and dosages.                                                                                                                                                                                                     | 3.875 | Why do my hands shake so much?                                                                                              | 4.375 |
| What kind of med combos are common and why?                                                                                 | 4.063 | How can I know if it's my medications making me sick or my disease?                                                                                                                                                                                                                                                             | 3.875 | What kind of med combos are common and why?                                                                                 | 4.375 |
| What about the drug and alcohol abuse? How do you help the person to overcome that when in conjunction with mental illness? | 4.063 | How safe is "Depakote"?                                                                                                                                                                                                                                                                                                         | 3.875 | Connection between ADHD and akathisia?                                                                                      | 4.375 |
| What's the effect on a bipolar patient's recovery when having taking an antidepressants versus not?                         | 4.000 | One drug at a time -- so I know side effects of each one.                                                                                                                                                                                                                                                                       | 3.875 | When on multiple drugs how to be sure they're safe together?                                                                | 4.250 |
| How safe is "Depakote"?                                                                                                     | 4.000 | How many times a night did patients waken on different meds?                                                                                                                                                                                                                                                                    | 3.875 | How many times a night did patients waken on different meds?                                                                | 4.250 |
| Are there shots or implants for effective BD treatment?                                                                     | 4.000 | What are my alternative treatment options when the past 2-3 rounds of medications have had limited success?                                                                                                                                                                                                                     | 3.875 | What about the drug and alcohol abuse? How do you help the person to overcome that when in conjunction with mental illness? | 4.250 |

|                                                                                                                                     |       |                                                                                                                                    |       |                                                                                                                                                                 |       |
|-------------------------------------------------------------------------------------------------------------------------------------|-------|------------------------------------------------------------------------------------------------------------------------------------|-------|-----------------------------------------------------------------------------------------------------------------------------------------------------------------|-------|
| Is it advisable to go off antipsychotics if a person has a predisposition to diabetes? If so, what would be alternative?            | 3.938 | What about the drug & alcohol abuse? How do you help the person to overcome that when in conjunction with mental illness?          | 3.875 | How safe is "Depakote"?                                                                                                                                         | 4.125 |
| What is the best way to get a streamline on all medications that could work for several different issues?                           | 3.938 | How long does it take for the medications to kick in?                                                                              | 3.750 | What happens when your son says the medicine makes him feel so sick? He would rather not be on it because it produces a sizzle effect on the brain? ("Zyprexa") | 4.125 |
| Why do my hands shake so much?                                                                                                      | 3.938 | What kind of med combos are common and why?                                                                                        | 3.750 | Drug cravings vs. different meds? Real discussion about medications interactions with substances. What are these?                                               | 4.125 |
| What are my alternative treatment options when the past 2-3 rounds of medications have had limited success?                         | 3.938 | Some medications have life-long deleterious effects or life threatening side effects. Better testing to prevent this would be nice | 3.750 | Is lithium making a comeback as a choice of treatment?                                                                                                          | 4.125 |
| What can a bipolar woman do to help mood during menopause? Besides medication, is hormone treatment okay or not advised, etc.?      | 3.813 | What can a bipolar woman do to help mood during menopause? Besides medication, is hormone treatment okay or not advised, etc.?     | 3.625 | What can a bipolar woman do to help mood during menopause? Besides medication, is hormone treatment okay or not advised, etc.?                                  | 4.000 |
| What is the best way to wean off meds?                                                                                              | 3.813 | Why is there side effects to this medication?                                                                                      | 3.625 | Are there shots or implants for effective BD treatment?                                                                                                         | 4.000 |
| Why is there side effects to this medication?                                                                                       | 3.750 | Should I change my diet if I'm on meds?                                                                                            | 3.625 | How often is LAB test on drug metabolism ever done?                                                                                                             | 4.000 |
| Some medications have life-long deleterious effects or life threatening side effects. Better testing to prevent this would be nice. | 3.750 | How long will side effects last?                                                                                                   | 3.500 | What are my alternative treatment options when the past 2-3 rounds of medications have had limited success?                                                     | 4.000 |
| How long will side effects last?                                                                                                    | 3.688 | Is it advisable to go off antipsychotics if a person has a predisposition to diabetes? If so, what would be alternative?           | 3.500 | How long will side effects last?                                                                                                                                | 3.875 |

|                                                                                                                                                                     |       |                                                                                                                                                                     |       |                                                                                                                                                                     |       |
|---------------------------------------------------------------------------------------------------------------------------------------------------------------------|-------|---------------------------------------------------------------------------------------------------------------------------------------------------------------------|-------|---------------------------------------------------------------------------------------------------------------------------------------------------------------------|-------|
| How long does it take for the medications to kick in?                                                                                                               | 3.688 | Why do my hands shake so much?                                                                                                                                      | 3.500 | What is the best way to get a streamline on all medications that could work for several different issues?                                                           | 3.875 |
| Connection between ADHD and akathisia?                                                                                                                              | 3.688 | What about sexual dysfunction as side effect?                                                                                                                       | 3.500 | What's the effect on a bipolar patient's recovery when having taking an antidepressants versus not?                                                                 | 3.875 |
| What happens when your son says the medicine makes him feel so sick? He would rather not be on it because it produces a sizzle effect on the brain? ("Zyprexa")     | 3.625 | What happens when you see that a small dose of "Abilify" did help stabilize, but then our son did not want to continue with the medication? (and it seemed hopeful) | 3.250 | How the medication affects your libido? What effects will you have on childbirth?                                                                                   | 3.875 |
| Should I change my diet if I'm on meds?                                                                                                                             | 3.625 | What is the best way to wean off meds?                                                                                                                              | 3.250 | Why is there side effects to this medication?                                                                                                                       | 3.875 |
| Is lithium making a comeback as a choice of treatment?                                                                                                              | 3.563 | What happens when your son says the medicine makes him feel so sick? He would rather not be on it because it produces a sizzle effect on the brain? ("Zyprexa")     | 3.125 | Some medications have life-long deleterious effects or life threatening side effects. Better testing to prevent this would be nice                                  | 3.750 |
| What about sexual dysfunction as side effect?                                                                                                                       | 3.500 | How the medication affects your libido? What effects will you have on childbirth?                                                                                   | 3.000 | How long does it take for the medications to kick in?                                                                                                               | 3.625 |
| How the medication affects your libido? What effects will you have on childbirth?                                                                                   | 3.438 | Is lithium making a comeback as a choice of treatment?                                                                                                              | 3.000 | Should I change my diet if I'm on meds?                                                                                                                             | 3.625 |
| How often is lab test on drug metabolism ever done?                                                                                                                 | 3.438 | Connection between ADHD and akathisia?                                                                                                                              | 3.000 | What happens when you see that a small dose of "Abilify" did help stabilize, but then our son did not want to continue with the medication? (and it seemed hopeful) | 3.500 |
| What happens when you see that a small dose of "Abilify" did help stabilize, but then our son did not want to continue with the medication? (and it seemed hopeful) | 3.375 | How often is lab test on drug metabolism ever done?                                                                                                                 | 2.875 | MRI, CT scans, how often are these utilized in determining treatment for BD?                                                                                        | 3.500 |
| MRI, CT scans, how often are these utilized in determining treatment for BD?                                                                                        | 3.000 | And what with all the night time peeing!?                                                                                                                           | 2.750 | What about sexual dysfunction as side effect?                                                                                                                       | 3.500 |

|                                                      |       |                                                                              |       |                                                      |       |
|------------------------------------------------------|-------|------------------------------------------------------------------------------|-------|------------------------------------------------------|-------|
| And what with all the night time peeing!?            | 2.875 | I wish I had known about the dry mouth from Lithium                          | 2.750 | And what with all the night time peeing!?            | 3.000 |
| I wish I had known about the dry mouth from Lithium. | 2.813 | MRI, CT scans, how often are these utilized in determining treatment for BD? | 2.500 | I wish I had known about the dry mouth from Lithium. | 2.875 |

**Supplementary Table 6:** Rating of questions related to the “Provider relations” theme.

| Researcher and patient stakeholders                                                                          |               | Researcher stakeholders                                                                                      |               | Patient stakeholders                                                                                         |               |
|--------------------------------------------------------------------------------------------------------------|---------------|--------------------------------------------------------------------------------------------------------------|---------------|--------------------------------------------------------------------------------------------------------------|---------------|
| Question                                                                                                     | Average score | Question                                                                                                     | Average score | Question                                                                                                     | Average score |
| How can you better understand my condition and what information will help you in "fine tuning" my treatment? | 4.313         | How can you better understand my condition and what information will help you in "fine tuning" my treatment? | 4.000         | How can you better understand my condition and what information will help you in "fine tuning" my treatment? | 4.625         |
| Poor relationship with psychiatrist. Non-compliant.                                                          | 3.750         | How come doctors don't spend more time with patients? Most therapy hours only last 15 min.                   | 3.250         | Poor relationship with psychiatrist. Non-compliant.                                                          | 4.250         |
| How come doctors don't spend more time with patients? Most therapy hours only last 15 min.                   | 3.688         | Poor relationship with psychiatrist. Non-compliant.                                                          | 3.250         | How come doctors don't spend more time with patients? Most therapy hours only last 15 min.                   | 4.125         |

**Supplementary Table 7:** Rating of questions related to the “Understanding BD” theme.

| Researcher and patient stakeholders                                                                |               | Researcher stakeholders                                                                                 |               | Patient stakeholders                                                                                                                                                      |               |
|----------------------------------------------------------------------------------------------------|---------------|---------------------------------------------------------------------------------------------------------|---------------|---------------------------------------------------------------------------------------------------------------------------------------------------------------------------|---------------|
| Question                                                                                           | Average score | Question                                                                                                | Average score | Question                                                                                                                                                                  | Average score |
| Would have been good to know severity of symptoms, especially dangers.                             | 4.563         | Would have been good to know severity of symptoms, especially dangers.                                  | 4.500         | What will happen to me?                                                                                                                                                   | 4.625         |
| What will happen to me?                                                                            | 4.313         | Are there common physical symptoms or issues that commonly co-occur with bipolar?                       | 4.125         | Education at the start of treatment structured, i.e. NAMI etc. for patient/consumer.                                                                                      | 4.625         |
| Are there common physical symptoms or issues that commonly co-occur with bipolar?                  | 4.313         | What will happen to me?                                                                                 | 4.000         | Would have been good to know severity of symptoms, especially dangers.                                                                                                    | 4.625         |
| What is bipolar? Expand. Knowledge of bipolar disorder.                                            | 4.125         | Does NOT being treated+ having psychotic events+ hallucinations worsen bipolar or decrease you IQ?      | 4.000         | What is bipolar? Expand. Knowledge of bipolar disorder.                                                                                                                   | 4.500         |
| Does NOT being treated+ having psychotic events+ hallucinations worsen bipolar or decrease you IQ? | 4.125         | What is co-occurring?                                                                                   | 4.000         | Are there common physical symptoms or issues that commonly co-occur with bipolar?                                                                                         | 4.500         |
| What is co-occurring?                                                                              | 4.125         | What happens to the brain/body after multiple psychiatric breaks?                                       | 3.875         | Better education of consumer on side effects/benefits of med choices                                                                                                      | 4.375         |
| Education at the start of treatment structured, i.e. NAMI etc. for patient/consumer                | 4.063         | I was told that bipolar in men becomes just depression as they age? If true, why not women? - Menopause | 3.875         | Is BD specific to genetics, environmental and or traumatic events? What are my triggers? What research is being done on the environmental impact of BD (pesticides etc.)? | 4.375         |
| Can a medication trigger a manic episode?                                                          | 4.063         | Sleep apnea. Obstructive and/or central.                                                                | 3.875         | Does NOT being treated+ having psychotic events+ hallucinations worsen bipolar or decrease you IQ?                                                                        | 4.250         |
| Better education of consumer on side effects/benefits of med choices.                              | 4.000         | Can a medication trigger a manic episode?                                                               | 3.875         | What is co-occurring?                                                                                                                                                     | 4.250         |

|                                                                                                                                                                           |       |                                                                                                                                                    |       |                                                                                                                   |       |
|---------------------------------------------------------------------------------------------------------------------------------------------------------------------------|-------|----------------------------------------------------------------------------------------------------------------------------------------------------|-------|-------------------------------------------------------------------------------------------------------------------|-------|
| I was told that bipolar in men becomes just depression as they age? If true, why not women? – Menopause.                                                                  | 3.938 | What is bipolar? Expand. Knowledge of bipolar disorder.                                                                                            | 3.750 | Can a medication trigger a manic episode?                                                                         | 4.250 |
| Is BD specific to genetics, environmental and or traumatic events? What are my triggers? What research is being done on the environmental impact of BD (pesticides etc.)? | 3.938 | Why did I get bipolar disorder?                                                                                                                    | 3.750 | SAD [Seasonal affective disorder]                                                                                 | 4.125 |
| What happens to the brain/body after multiple psychiatric breaks?                                                                                                         | 3.875 | Can you please go deeper into explaining this illness?                                                                                             | 3.750 | How do illegal drugs affect onset of mental illness?                                                              | 4.125 |
| How do illegal drugs affect onset of mental illness?                                                                                                                      | 3.875 | Better education of consumer on side effects/benefits of med choices                                                                               | 3.625 | Can Bipolar be a result of early childhood trauma? Is childhood trauma a factor of getting bipolar?               | 4.125 |
| Percent of BD on stimulants? Analysis of stimulant type vs. other drugs the person is on?                                                                                 | 3.813 | Percent of BD on stimulants? Analysis of stimulant type vs. other drugs the person is on?                                                          | 3.625 | Are there symptoms beyond mania and depression that are commonly experienced, like explosiveness or irritability? | 4.000 |
| Can you please go deeper into explaining this illness?                                                                                                                    | 3.813 | What tends to mask the symptoms of bipolar?                                                                                                        | 3.625 | Percent of BD on stimulants? Analysis of stimulant type vs. other drugs the person is on?                         | 4.000 |
| Sleep apnea. Obstructive and/or central.                                                                                                                                  | 3.813 | How do illegal drugs affect onset of mental illness?                                                                                               | 3.625 | Can severe BD be triggered by PTSD?                                                                               | 4.000 |
| Are foods, substances i.e. alcohol a known trigger?                                                                                                                       | 3.750 | Education at the start of treatment structured, i.e. NAMI etc. for patient/consumer.                                                               | 3.500 | Are foods, substances i.e. alcohol a known trigger?                                                               | 4.000 |
| Am I really bipolar or is it caused by antidepressants?                                                                                                                   | 3.750 | Education of significant others at start of treatment. I would have asked for more education for all family members including siblings (under 18). | 3.500 | I was told that bipolar in men becomes just depression as they age? If true, why not women? - Menopause           | 4.000 |
| What tends to mask the symptoms of bipolar?                                                                                                                               | 3.750 | Are foods, substances i.e. alcohol a known trigger?                                                                                                | 3.500 | Am I really bipolar or is it caused by antidepressants?                                                           | 4.000 |
| SAD [Seasonal affective disorder].                                                                                                                                        | 3.688 | Am I really bipolar or is it caused by antidepressants?                                                                                            | 3.500 | Interaction of comorbid BD and Major Depression.                                                                  | 4.000 |

|                                                                                                                                                    |       |                                                                                                                                                                           |       |                                                                                                                                                    |       |
|----------------------------------------------------------------------------------------------------------------------------------------------------|-------|---------------------------------------------------------------------------------------------------------------------------------------------------------------------------|-------|----------------------------------------------------------------------------------------------------------------------------------------------------|-------|
| Can Bipolar be a result of early childhood trauma? Is childhood trauma a factor of getting bipolar?                                                | 3.688 | Is BD specific to genetics, environmental and or traumatic events? What are my triggers? What research is being done on the environmental impact of BD (pesticides etc.)? | 3.500 | What happens to the brain/body after multiple psychiatric breaks?                                                                                  | 3.875 |
| Does trauma in vitro [sic. in utero] affect the baby?                                                                                              | 3.688 | Does trauma in vitro [sic. in utero] affect the baby?                                                                                                                     | 3.500 | Explain effects of disease. Not attack me, I am not my disease.                                                                                    | 3.875 |
| Why did I get bipolar disorder?                                                                                                                    | 3.625 | Can severe BD be triggered by PTSD?                                                                                                                                       | 3.250 | Can you please go deeper into explaining this illness?                                                                                             | 3.875 |
| Education of significant others at start of treatment. I would have asked for more education for all family members including siblings (under 18). | 3.625 | Tired of feeling like crap, when will it stop?                                                                                                                            | 3.250 | What tends to mask the symptoms of bipolar?                                                                                                        | 3.875 |
| Can severe BD be triggered by PTSD?                                                                                                                | 3.625 | SAD [Seasonal affective disorder].                                                                                                                                        | 3.250 | Does trauma in vitro [sic. in utero] affect the baby?                                                                                              | 3.875 |
| Interaction of comorbid BD and Major Depression.                                                                                                   | 3.625 | Can Bipolar be a result of early childhood trauma? Is childhood trauma a factor of getting bipolar?                                                                       | 3.250 | Education of significant others at start of treatment. I would have asked for more education for all family members including siblings (under 18). | 3.750 |
| Are there symptoms beyond mania and depression that are commonly experienced, like explosiveness or irritability?                                  | 3.563 | Interaction of comorbid BD and Major Depression.                                                                                                                          | 3.250 | Tired of feeling like crap, when will it stop?                                                                                                     | 3.750 |
| Tired of feeling like crap, when will it stop?                                                                                                     | 3.500 | Are there symptoms beyond mania and depression that are commonly experienced, like explosiveness or irritability?                                                         | 3.125 | Sleep apnea. Obstructive and/or central.                                                                                                           | 3.750 |
| Explain effects of disease. Not attack me, I am not my disease.                                                                                    | 3.438 | Explain effects of disease. Not attack me, I am not my disease.                                                                                                           | 3.000 | Effect of condition on personality matrix.                                                                                                         | 3.750 |
| Effect of condition on personality matrix.                                                                                                         | 3.375 | Effect of condition on personality matrix.                                                                                                                                | 3.000 | Why did I get bipolar disorder?                                                                                                                    | 3.500 |

|                                                                                               |       |                                                                                               |       |                                                                                               |       |
|-----------------------------------------------------------------------------------------------|-------|-----------------------------------------------------------------------------------------------|-------|-----------------------------------------------------------------------------------------------|-------|
| What happens when your son just smokes cigarettes incessantly and you worry about his health? | 3.125 | What happens when your son just smokes cigarettes incessantly and you worry about his health? | 2.750 | What happens when your son just smokes cigarettes incessantly and you worry about his health? | 3.500 |
|-----------------------------------------------------------------------------------------------|-------|-----------------------------------------------------------------------------------------------|-------|-----------------------------------------------------------------------------------------------|-------|

**Supplementary Table 8:** Rating of questions related to the “Support” theme.

| Researcher and patient stakeholders                                                                                                                                                                                               |               | Researcher stakeholders                                                                                                                                                                                                           |               | Patient stakeholders                                                                                                                                                                                                              |               |
|-----------------------------------------------------------------------------------------------------------------------------------------------------------------------------------------------------------------------------------|---------------|-----------------------------------------------------------------------------------------------------------------------------------------------------------------------------------------------------------------------------------|---------------|-----------------------------------------------------------------------------------------------------------------------------------------------------------------------------------------------------------------------------------|---------------|
| Question                                                                                                                                                                                                                          | Average score | Question                                                                                                                                                                                                                          | Average score | Question                                                                                                                                                                                                                          | Average score |
| I wish they would of shown me where to find support when suicidal.                                                                                                                                                                | 4.063         | I wish they would of shown me where to find support when suicidal.                                                                                                                                                                | 3.875         | I wish they would of shown me where to find support when suicidal.                                                                                                                                                                | 4.250         |
| Where can you go to get support for substance abuse, bipolar, schizophrenia, therapy, housing? Sometimes it feels like there is no one to help.                                                                                   | 3.813         | Where can you go to get support for substance abuse, bipolar, schizophrenia, therapy, housing? Sometimes it feels like there is no one to help.                                                                                   | 3.625         | Where/how to find an excellent counselor?                                                                                                                                                                                         | 4.125         |
| How does the family support loved ones choice of treatment if episodic events continue to occur? Support groups are nowhere to be found (except online) for family or patients. How can my family support me with mental illness? | 3.688         | How does the family support loved ones choice of treatment if episodic events continue to occur? Support groups are nowhere to be found (except online) for family or patients. How can my family support me with mental illness? | 3.625         | Where can you go to get support for substance abuse, bipolar, schizophrenia, therapy, housing? Sometimes it feels like there is no one to help.                                                                                   | 4.000         |
| Where/how to find an excellent counselor?                                                                                                                                                                                         | 3.625         | Where/how to find an excellent counselor?                                                                                                                                                                                         | 3.125         | How does the family support loved ones choice of treatment if episodic events continue to occur? Support groups are nowhere to be found (except online) for family or patients. How can my family support me with mental illness? | 3.750         |
| Why can't my family be more involved with my treatment?                                                                                                                                                                           | 3.313         | Why can't my family be more involved with my treatment?                                                                                                                                                                           | 3.000         | Why can't my family be more involved with my treatment?                                                                                                                                                                           | 3.625         |

**Supplementary Table 9:** Rating of questions related to the “Health care system navigation” theme.

| Researcher and patient stakeholders                                                                                                                                                                                                         |               | Researcher stakeholders                                                                                                                                                                                                                     |               | Patient stakeholders                                                                                                                                                                                                                        |               |
|---------------------------------------------------------------------------------------------------------------------------------------------------------------------------------------------------------------------------------------------|---------------|---------------------------------------------------------------------------------------------------------------------------------------------------------------------------------------------------------------------------------------------|---------------|---------------------------------------------------------------------------------------------------------------------------------------------------------------------------------------------------------------------------------------------|---------------|
| Question                                                                                                                                                                                                                                    | Average score | Question                                                                                                                                                                                                                                    | Average score | Question                                                                                                                                                                                                                                    | Average score |
| How do I find the right doctor? Where do I go to find the best doctor? Who's is the right doctor or specialist in L.A. I can trust? How to find a doctor that really knows bipolar? Where should I go to get good therapy once I'm on meds? | 3.750         | How do I find the right doctor? Where do I go to find the best doctor? Who's is the right doctor or specialist in L.A. I can trust? How to find a doctor that really knows bipolar? Where should I go to get good therapy once I'm on meds? | 3.250         | How do I find the right doctor? Where do I go to find the best doctor? Who's is the right doctor or specialist in L.A. I can trust? How to find a doctor that really knows bipolar? Where should I go to get good therapy once I'm on meds? | 4.250         |
| How often should bipolar patients talk to their psychiatrist?                                                                                                                                                                               | 3.500         | Should I go inpatient in the hospital to change meds?                                                                                                                                                                                       | 3.000         | How often should bipolar patients talk to their psychiatrist?                                                                                                                                                                               | 4.250         |
| Should I go inpatient in the hospital to change meds?                                                                                                                                                                                       | 3.438         | How often should bipolar patients talk to their psychiatrist?                                                                                                                                                                               | 2.750         | Should I go inpatient in the hospital to change meds?                                                                                                                                                                                       | 3.875         |
| I would have had a physician follow my child's physical health                                                                                                                                                                              | 2.875         | I would have had a physician follow my child's physical health                                                                                                                                                                              | 2.125         | I would have had a physician follow my child's physical health                                                                                                                                                                              | 3.625         |

**Supplementary Table 10:** Rating of questions related to the “Diagnosis” theme.

| Researcher and patient stakeholders                                                                                 |               | Researcher stakeholders                                                                                             |               | Patient stakeholders                                                                                                |               |
|---------------------------------------------------------------------------------------------------------------------|---------------|---------------------------------------------------------------------------------------------------------------------|---------------|---------------------------------------------------------------------------------------------------------------------|---------------|
| Question                                                                                                            | Average score | Question                                                                                                            | Average score | Question                                                                                                            | Average score |
| Diagnosed earlier.                                                                                                  | 4.000         | Diagnosed earlier.                                                                                                  | 4.125         | How do you know I'm [this] diagnosis?                                                                               | 4.000         |
| How do you know I'm [this] diagnosis?                                                                               | 3.813         | How do you know I'm [this] diagnosis?                                                                               | 3.625         | Diagnosed earlier.                                                                                                  | 3.875         |
| Why is BD considered as possible diagnosis, after diagnosis of depression? (antidepressants trigger manic behavior) | 3.750         | Why is BD considered as possible diagnosis, after diagnosis of depression? (antidepressants trigger manic behavior) | 3.625         | Why is BD considered as possible diagnosis, AFTER diagnosis of depression? (antidepressants trigger manic behavior) | 3.875         |
| What is the difference in bipolar patient evaluation over the phone vs. in person?                                  | 3.063         | What is the difference in bipolar patient evaluation over the phone vs. in person?                                  | 2.750         | Is a diagnosis from a psychopharmacologist better than a psychiatrist?                                              | 3.500         |
| Is a diagnosis from a psychopharmacologist better than a psychiatrist?                                              | 3.063         | Is a diagnosis from a psychopharmacologist better than a psychiatrist?                                              | 2.625         | What is the difference in bipolar patient evaluation over the phone vs. in person?                                  | 3.375         |

**Supplementary Table 11:** Rating of questions related to the “BD coping/management” theme.

| Researcher and patient stakeholders                                                                                                         |               | Researcher stakeholders                                                                                                                     |               | Patient stakeholders                                                                                                                        |               |
|---------------------------------------------------------------------------------------------------------------------------------------------|---------------|---------------------------------------------------------------------------------------------------------------------------------------------|---------------|---------------------------------------------------------------------------------------------------------------------------------------------|---------------|
| Question                                                                                                                                    | Average score | Question                                                                                                                                    | Average score | Question                                                                                                                                    | Average score |
| How should I manage the manic episode?                                                                                                      | 4.500         | How should I manage the manic episode?                                                                                                      | 4.250         | How should I manage the manic episode?                                                                                                      | 4.750         |
| How do you control your mood episode?                                                                                                       | 4.313         | How to stop bad thoughts and dreams?                                                                                                        | 4.250         | How do you control your mood episode?                                                                                                       | 4.500         |
| How to stop bad thoughts and dreams?                                                                                                        | 4.250         | How do you control your mood episode?                                                                                                       | 4.125         | How to handle everyday delusions and/or paranoia?                                                                                           | 4.500         |
| How to handle everyday delusions and/or paranoia?                                                                                           | 4.188         | How to handle everyday delusions and/or paranoia?                                                                                           | 3.875         | How to stop bad thoughts and dreams?                                                                                                        | 4.250         |
| When is hospitalization necessary?                                                                                                          | 3.938         | When is hospitalization necessary?                                                                                                          | 3.750         | If I am not currently stable, how can I take meds, eat right, sleep better and feel OK if I'm dealing with multiple issues for a long time? | 4.125         |
| If I am not currently stable, how can I take meds, eat right, sleep better and feel OK if I'm dealing with multiple issues for a long time? | 3.750         | If I am not currently stable, how can I take meds, eat right, sleep better and feel OK if I'm dealing with multiple issues for a long time? | 3.375         | When is hospitalization necessary?                                                                                                          | 4.125         |
| What are the advantages of mania in surviving hellish situations?                                                                           | 3.313         | What are the advantages of mania in surviving hellish situations?                                                                           | 2.875         | When first being diagnosed how to handle sex drive?                                                                                         | 3.750         |
| When first being diagnosed how to handle sex drive?                                                                                         | 3.188         | When first being diagnosed how to handle sex drive?                                                                                         | 2.625         | What are the advantages of mania in surviving hellish situations?                                                                           | 3.750         |

**Supplementary Table 12:** Rating of questions related to the “Social bias and stigma” theme.

| Researcher and patient stakeholders                                                                                                                |               | Researcher stakeholders                                                                                                                            |               | Patient stakeholders                                                                                                                               |               |
|----------------------------------------------------------------------------------------------------------------------------------------------------|---------------|----------------------------------------------------------------------------------------------------------------------------------------------------|---------------|----------------------------------------------------------------------------------------------------------------------------------------------------|---------------|
| Question                                                                                                                                           | Average score | Question                                                                                                                                           | Average score | Question                                                                                                                                           | Average score |
| Education of significant others at start of treatment. I would have asked for more education for all family members including siblings (under 18). | 3.688         | Education of significant others at start of treatment. I would have asked for more education for all family members including siblings (under 18). | 3.125         | Education of significant others at start of treatment. I would have asked for more education for all family members including siblings (under 18). | 4.250         |
| How will this illness effect my professional life?                                                                                                 | 3.241         | How will this illness effect my professional life?                                                                                                 | 2.625         | How will this illness effect my professional life?                                                                                                 | 3.857         |
| Why do poor people get labeled as deviants while rich people get diagnosed?                                                                        | 2.938         | Why do poor people get labeled as deviants while rich people get diagnosed?                                                                        | 2.500         | Why do poor people get labeled as deviants while rich people get diagnosed?                                                                        | 3.375         |

**Supplementary Table 13:** Rating of questions related to the “Big ideas and children” theme.

| Researcher and patient stakeholders                                                                                                                                                 |               | Researcher stakeholders                                                                                                                                                             |               | Patient stakeholders                                                                                                                                                                |               |
|-------------------------------------------------------------------------------------------------------------------------------------------------------------------------------------|---------------|-------------------------------------------------------------------------------------------------------------------------------------------------------------------------------------|---------------|-------------------------------------------------------------------------------------------------------------------------------------------------------------------------------------|---------------|
| Question                                                                                                                                                                            | Average score | Question                                                                                                                                                                            | Average score | Question                                                                                                                                                                            | Average score |
| Side effects different for young children? I want to know how puberty affects medication efficacy.                                                                                  | 4.500         | Side effects different for young children? I want to know how puberty affects medication efficacy.                                                                                  | 4.375         | I would have asked about alternative treatments for children.                                                                                                                       | 4.625         |
| What are the early warning signs for bipolar for teenager?                                                                                                                          | 4.438         | What are the early warning signs for bipolar for teenager?                                                                                                                          | 4.250         | Side effects different for young children? I want to know how puberty affects medication efficacy.                                                                                  | 4.625         |
| What effects will my child have on this medication? Shaking/staring, frozen movements, etc.                                                                                         | 4.250         | What effects will my child have on this medication? Shaking/staring, frozen movements, etc.                                                                                         | 4.000         | What are the early warning signs for bipolar for teenager?                                                                                                                          | 4.625         |
| I would have asked about alternative treatments for children.                                                                                                                       | 4.188         | How are young children being given diagnosis of BD? What are obstacles to childhood diagnosis?                                                                                      | 4.000         | What effects will my child have on this medication? Shaking/staring, frozen movements, etc.                                                                                         | 4.500         |
| How are young children being given diagnosis of BD? What are obstacles to childhood diagnosis?                                                                                      | 4.188         | I would have asked about alternative treatments for children.                                                                                                                       | 3.750         | There are cultural barriers that exist. We didn't talk about mental illness. Opening the dialog. Impact of race and culture on diagnosis. What medications work for what ethnicity? | 4.375         |
| There are cultural barriers that exist. We didn't talk about mental illness. Opening the dialog. Impact of race and culture on diagnosis. What medications work for what ethnicity? | 3.938         | There are cultural barriers that exist. We didn't talk about mental illness. Opening the dialog. Impact of race and culture on diagnosis. What medications work for what ethnicity? | 3.500         | How are young children being given diagnosis of BD? What are obstacles to childhood diagnosis?                                                                                      | 4.375         |

## Focus Groups Script

### Longitudinal Comparative Effectiveness of Bipolar Disorder Therapies (IRB# 16-243)

#### Welcome

Thank you for agreeing to be part of the focus group. We appreciate your willingness to participate.

#### Introduction

*[The facilitators introduce themselves.]*

We were fortunate enough to receive funding from the Patient Centered Outcomes Research Institute, known as PCORI, to address a long-standing patient-centered need about effectiveness of bipolar disorder therapies for people with bipolar disorder. Approximately 5.7 million people are affected with bipolar disorder in the US alone, but how to best meet the needs of the individual patient and which treatment works best for each patient is not well known. Some medications, such as lithium, have been around for a long time, but concerns about side effects have limited their use, despite good evidence for their effectiveness. Other medications, such as second-generation antipsychotics, have more recently been added as treatment options, but limited data are available in specific groups, such as the elderly or young people. Many people with bipolar disorder report that the same treatment has different outcomes for different people. More evidence about the best treatment for a specific individual with bipolar disorder will help doctors and those seeking treatment to select the best treatment(s) for the best disease outcomes.

The goal of our study is to assess the short- and long-term effects of commonly used treatment options for bipolar disorder, including non-treatment. Rather than going out and collecting data, we are going to answer specific research questions about treatment effectiveness by examining a large health insurance claims database of over 1 million people with bipolar disorder. We would like your input on what those specific research questions should be. That is, we want to hear from people who have bipolar disorder and family members of those with bipolar disorder about what would be helpful for them to know about the treatment of bipolar disorder, including side effects and other outcomes. More specifically, we want you to think about what you wish you had known in advance or over the course of treatment for bipolar disorder.

## **Participant Consent**

Before we ask your written consent to participate in the study, we will be going over some details. Please feel free to stop us to ask any clarifying questions. We are handing out consent forms for you to read and review.

*[Hand out consent forms.]*

Our study can only include adults who are able to consent, who have bipolar disorder, or have a first-degree relative with bipolar disorder, and can communicate in English. We will ask you to acknowledge that you are eligible in the consent form, and show proof of age.

You were selected as a possible participant in this study because you have responded to our call for participation, which has been distributed through the local chapters of NAMI, and you have expressed interest in helping us to answer the question, “what do you wish you had known in the past that could have helped you in managing your disease or the disease of your loved one(s)”.

Your participation in the focus group is voluntary.

If you volunteer to participate in the focus group, you will be asked to do the following:

You will be asked to participate in this patient focus group, to capture patient-centered outcomes of interest that will hopefully drive the research. Our focus groups will each be made up of 8-12 people who live with bipolar disorder as a patient, or who have experienced bipolar disorder in a family member.

In the focus group, you will be asked in hindsight, what you wish you had known in advance over the course of bipolar disorder treatment.

You may refuse to answer any questions that you do not want to answer and still remain in the study.

### Potential risks

Every effort will be made to protect the information you give us, but there may risk of loss of confidentiality. A research assistant will be in the room taking notes from the discussion but names will

not be included in the notes so that statements will not be linked to any one individual. No identifying information is being collected. The qualitative data resulting from the focus groups will be maintained on a password protected secure server. Files will be available only to authorized members of the research team, for the duration of the study. Information resulting from this study will be used for research purposes and may be published; however, you will not be identified by name in any publications and data from all participants will be combined and presented for the group overall.

Information from your participation in this study may be reviewed by federal and state regulatory agencies, and by the UNM Human Research Review Committee (HRRC) which provides regulatory and ethical oversight of human research.

All participants will be asked to keep what is said during the group discussion between the participants only. However, complete confidentiality cannot be guaranteed.

There may be some discomfort associated with sharing or hearing about negative experiences of adverse impacts of bipolar disorder on patient and patient family member lives, but a mental health professional will be on-hand to facilitate should any difficulties arise.

#### Potential benefits

There may or may not be direct benefit to you from being in this study. You may experience a sense of satisfaction from contributing as a subject matter expert to identify high value patient-centered questions of importance to bipolar disorder patients and their families.

The results of the research may provide supporting evidence for a question that is a main concern of every patient with bipolar disorder: "Which treatment works best for a patient like me." Our approach also has the potential to identify patient groups that do not respond well with currently available medications. Such patients could then be the focus of further research into the pathophysiology of their disorder subtype, and which therapeutic options work best. Information about unintended medication effects in specific patient populations gained from this study could also result in enhanced treatment safety. In the long-term, such results have the potential to increase patient/doctor/provider trust and improve long-term therapeutic relationships, an important parameter for improved outcomes.

This study could help in prevention of unintended treatment effects, and assessment of treatment options for patients with bipolar disorder. We will address important evidence gaps on bipolar disorder treatment outcomes for specific subgroups of patients, and in so doing, aim to improve healthcare by

supporting informed decision making. Through communication and dissemination of our results, we will support shared decision making between patients and providers.

### Logistics

Participation in the focus group will take approximately 3 hours.

You will receive \$450 for your full participation in the focus group in the form of a visa gift card. The payment will be received after completion of the focus group. This compensation requires full participation in the focus group.

You can choose whether or not you want to be in this study, and you may withdraw your consent and discontinue participation at any time. Whatever decision you make, there will be no penalty to you.

You may refuse to answer any questions that you do not want to answer and still remain in the focus group.

If you have any questions, comments or concerns about the research, you can talk to the one of the researchers or contact the numbers listed on the consent form in front of you.

You will be given a copy of the consent form for your records.

*[Ask if there are any questions and be sure to get signed consent forms from all those who agree to participate in the focus group. Verify age by asking to see a driver's license or passport.]*

### **Ground Rules**

Now that consent is complete, we would like to set some ground rules for the duration of our focus group:

1. WE WANT YOU TO DO THE TALKING.

We would like everyone to participate.

I may call on you if I haven't heard from you in a while.

## 2. ENCOURAGE EVERYONE TO CONTRIBUTE

Minimize interruptions.

Try to keep your thoughts to the point, so everyone gets a chance to talk.

## 3. THERE ARE NO RIGHT OR WRONG ANSWERS

Every person's experiences and opinions are important.

Speak up whether you agree or disagree.

We want to hear a wide range of opinions.

## 4. WHAT IS SAID IN THIS ROOM STAYS HERE

We want folks to feel comfortable sharing when sensitive issues come up.

## 5. WE WILL BE TAKING NOTES DURING THE FOCUS GROUP.

We want to capture everything you have to say.

We don't identify anyone by name in our notes. You will remain anonymous.

Are there any other rules that we should add to this list?

Can we all agree to abide by these ground rules?

*[Get agreement from each person]*

### **Consented Participant Introductions**

Before we commence with our focus group discussions, to break the ice, we'd like to invite each of you to each spend about a minute to talk a bit about yourself. You do not have to disclose your name. We will not be writing down any names within our notes.

*[Patients introduce themselves.]*

## **What the project is about**

In this research project we would like to identify treatment outcomes that matter to patients over their lifetime and then we will compare the outcomes for common treatments for bipolar disorder, including non-treatment. In large health insurance claims data sets, we would like to study differences in treatment effects in different patient groups. We expect that the outcomes for the same treatment will vary by bipolar disorder subtype, age, gender, and other medical conditions or treatments of a patient.

## **What the database includes**

We will use de-identified health insurance claims records from over 1 million patients with bipolar disorder collected over several years to investigate treatment effects and long-term outcomes overall and also in specific groups of patients, such as the elderly or young adults. These records come from all over the United States but it is important to remember that no one individual can be identified in this dataset.

You might think of the data as a timeline of most of the medical activity of a patient as they engage with healthcare providers. This includes inpatient, outpatient and emergency room visits, diagnoses, drug prescriptions filled, procedures performed, and even payment information. We do not have medical notes or the results of lab tests, but we have basic demographic information on patients, including age, sex, and state of residence. Since the data have been collected in real life settings, such as doctors' offices, emergency rooms, hospitals and other health care settings, the data reflect the diversity of patients with bipolar disorder, and the entire range of medical conditions that could be associated with bipolar disorder.

Because we have such a rich data set, we hope to be able to answer questions, such as:

- What do you wish you had known in the past that could have helped you in managing your disease or the disease of your loved one(s)?
- Which drug is best for controlling mood episodes?
- What drug is best for children for reducing suicidal behavior?
- What would have been helpful for your family to know about your illness?
- What are some of the positive benefits or negative side effects of treatment for bipolar disorder that surprised you?
- What are some of the things that bother you the most about having bipolar disorder and the medical treatment of bipolar disorder?
- Have you ever ended up back in the doctor's office or in another treatment environment after starting medication, changing medication dosages or types, or ceasing medications? If so, what symptoms made that follow-on doctor's visit necessary?

## Affinity mapping exercise

### Step 1

In order to gather the most perspectives, we ask each of you to take the next 15 minutes to write down, one idea per post-it note, the questions that you would like answered in this study about bipolar treatments, outcomes and side effects.

Please do not write your name on your questions. After you have written down your questions, please stick them up on the wall in random, but reachable, locations -- we will organize them later in a group exercise.

Does anyone have any questions before we begin?

### Step 2

We now are going to try to cluster these questions into similar categories. We are going to ask everyone stand up, and silently move up and down the wall, moving the post-it notes with similar themes into clusters of post-it notes, separated by space on the wall. It is easiest to start by pairing up very similar ideas, and looking for others that are close. You are free to recategorize the post-it notes that are already in groups, as well as create entirely new categories. It is okay to silently disagree with people who have a different viewpoint. If an idea is a "loner" that does not seem to fit in any group, it is okay for it to stand alone. Once you feel you have contributed all you can to organize the content, you may sit down.

Does anyone have any questions before we begin?

### Step 3

We are now going to try to create a descriptive title for each of these groups. I'm going to read off the content of each group, and then ask for a suggested title. We may discover a relationship between two groups and arrange them in columns under a superheader.

*[Facilitator tries to gain general agreement on a label for each major category.]*

### Step 4

Now that we have identified the major themes, we would like to have you help prioritize them to guide our ongoing research efforts. Would you please write the number 1 on one post-it note, 2 on a second, and 3 on a third post-it note. Now, please go up to the wall and place the number 3 above your top priority group, number 2 above your second priority, and number 1 above your third most important. Remember, bigger numbers mean it is more important.

## Step 5

*[Invite participants to take a 15-minute break and get a snack while we tally up the results and prepare for discussion. The facilitators calculate the sums for each category and write them on a sticky note in bright marker. Participants are invited to eat at the table during the discussion.]*

We will now write down the list of topics from highest to lowest total points on a flip-chart.

How do you feel about this categorization?

*[Discussion (encourage all to share in turn).]*

Will this categorization do the most good for the most patients?

*[Discussion (encourage all to share in turn).]*

### **Closing of the focus group**

What we are going to do going forwards is take a deep look at our data to see how feasible it is to tackle these topics, and prioritize our research as best we can according to the information you shared with us today. We intend to disseminate our findings through NAMI in the coming months and years, so please stay tuned.

Thank you all so much for your participation. Before you leave, we will distribute the honorarium for your participation.

*[The moderator thanks each participant as he/she distributes the honorarium (incentive).]*

*[Immediately after all participants leave, the moderator and assistant moderator debrief and label all notes with the date, time and location of the focus group.]*
